# Supplementary material for: 2D/2D Heterojunction of TiO2 Nanoparticles and Ultrathin G-C3N4 Nanosheets for Efficient Photocatalytic Hydrogen Evolution
Source: MDPI journal article supplement (doi:10.3390/nano12091557), 2022-05-04
Supplement: s1 [file s1]

## Supporting Information

### **2D/2D Heterojunction of TiO<sub>2</sub> Nanosheets / Ultrathin g-C<sub>3</sub>N<sub>4</sub> for efficient photocatalytic hydrogen evolution**

Ruifeng Du<sup>a,b</sup>, Baoying Li<sup>c,\*</sup>, Xu Han<sup>d</sup>, Ke Xiao<sup>a,b</sup>, Xiang Wang<sup>a,b</sup>, Chaoqi Zhang<sup>a,b</sup>, Jordi Arbiol<sup>d,e</sup>, Andreu Cabot<sup>a,e,\*</sup>

<sup>a</sup> Catalonia Energy Research Institute - IREC, Sant Adrià de Besòs, 08930 Barcelona, Spain

<sup>b</sup> Departament d'Enginyeria Electrònica i Biomèdica, Universitat de Barcelona, 08028, Barcelona, Spain

<sup>c</sup> Shandong Provincial Key Laboratory of Molecular Engineering, State Key Laboratory of Biobased Material and Green Papermaking, School of Chemistry and Chemical Engineering, Qilu University of Technology, Shandong Academy of Sciences, Jinan, 250353, P. R. China

<sup>d</sup> Catalan Institute of Nanoscience and Nanotechnology (ICN2), CSIC and BIST, Campus UAB, Bellaterra, 08193, Barcelona, Catalonia, Spain

<sup>e</sup> ICREA, Pg. Lluís Companys 23, 08010 Barcelona, Catalonia, Spain.

#### **Characterization**

The particle size and shape of the samples were characterized by scanning electron microscopy (SEM) using in a Zeiss Auriga microscope (Carl Zeiss, Jena, Germany) with an energy-dispersive X-ray spectroscopy (EDS) detector at 20 kV to study the composition and transmission electron microscopy (TEM) using a ZEISS LIBRA 120, operating at 120 kV. High-resolution TEM (HRTEM) studies were conducted using a field emission gun FEI Tecnai F20 microscope at 200 kV with a point-to-point resolution of 0.19 nm. Powder X-ray diffraction (XRD) patterns were collected directly from the as-synthesized nanoparticles dropped on Si(501) substrates on a Bruker AXS D8 Advance X-ray diffractometer with Nifiltered (2 µm thickness) Cu K $\alpha$  radiation ( $\lambda$  = 1.5406 Å) operating at 40 kV and 40 mA. A LynxEye linear position-sensitive detector was used in reflection geometry. Characterization of the surface was done by X-ray photoelectron spectroscopy (XPS) on a SPECS system equipped with a XR50 source operating at 250 W and a Phoibos 150 MCD-9 detector. The pass energy of the hemispherical analyzer was set at 20 eV, and the energy step of high-resolution spectra was set at 0.05 eV. The pressure in the analysis chamber

was always below  $10^{-7}$  Pa. The specific surface area and analysis of the pore size distribution were obtained from nitrogen adsorption/desorption isotherms on Tristar II 3020 Micromeritics system. Fourier transform infrared (FTIR) spectra were recorded on an Alpha Bruker spectrometer. The optical properties of samples were analyzed by a UV-vis spectrophotometer (UV-2600, Shimadzu). Photoluminescence (PL) spectra of aqueous photocatalysts suspension (0.1 g/L) were collected on a fluorescence spectrophotometer (F-7000, Hitachi), and the wavelength of excitation light is 370 nm. The decay time measurements were carried out on a compact fluorescence lifetime spectrometer (Quantaaurus-Tau, C11367, HAMAMATSU), and an LED lamp (365 nm) was used as an excitation source.

### Electrocatalysis measurement

The photocurrent and electrochemical impedance spectroscopy (EIS) investigations were carried out on a CHI-760 electrochemical analyzer using a three-electrode cell system with indium tin oxide (ITO)/sample as the working electrode, platinum net as the counter electrode and standard calomel electrode (SCE) as the reference. A 300 W Xe lamp with a cut-off filter of 420 nm was utilized as the light source. Furthermore, the ITO/sample electrodes were fabricated as follows: first, samples (5 mg) were added into solutions containing DI water (0.5mL), ethanol (0.5 mL) and Nafion (20uL) and ultrasonicated for 20 min. Then, the resultant sample slurry (0.1 mL) was casted onto pre-cleaned ITO glass and then dried at 60°C for 2 h.

### Apparent quantum efficiency (AQE) calculations

The apparent quantum efficiency can be evaluated from following equation:

$$AQE = \frac{2 \times n_{H_2} \times N_A}{N}$$

$n_{H_2}$  is the number of evolved  $H_2$  molecules,  $N_A$  is Avogadro number ( $6.02 \times 10^{23}$ ) and N represents the number of incident photons, which can be calculated from following equation :

$$N = \frac{\text{light intensity (W cm}^{-2}\text{)} \times \text{illumination area (cm}^2\text{)}}{\frac{hc}{\lambda}}$$

$h$  is plank constant ( $6.626 \times 10^{-34}$  J·s =  $4.136 \times 10^{-15}$  eV·s),  $c$  is the speed of light ( $3.0 \times 10^8$  m·s<sup>-1</sup>),  $\lambda$  is the wavelength of light (380 nm, 420 nm).

Test method for light with wavelengths of 380 and 420 nm. The photocatalytic systems with 200 mg catalyst and 100 mL solution (90 mL DI water, 10 mL methanol and 1 wt% Pt cocatalyst). The mixed solution was bubbled with  $N_2$  for 30 min to ensure anaerobic condition and illuminated 30

min with ultraviolet light before simulated solar light irradiation to measure  $H_2$  evolution. The test time was 1h and irradiated area is  $28.26\text{ cm}^2$ .

The light intensity and resulting  $n_{H_2}$  are listed in the table S2.

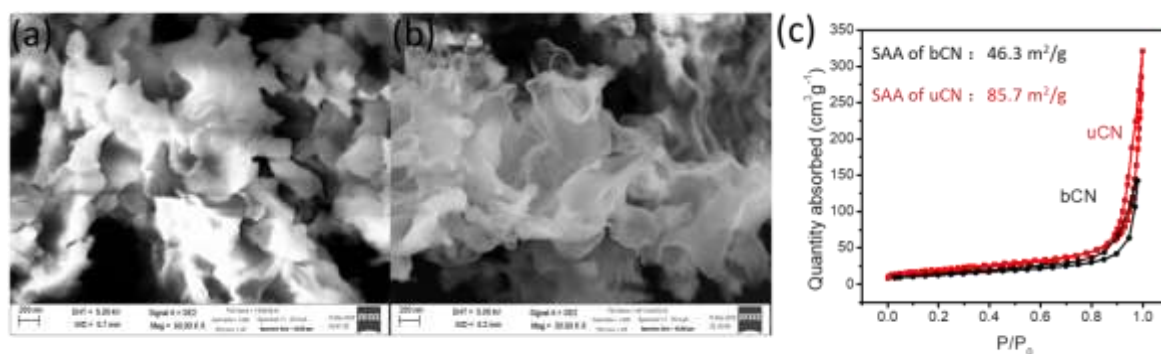

**Figure S1.** SEM image of (a) bulk  $g\text{-C}_3\text{N}_4$  and (b) ultrathin  $g\text{-C}_3\text{N}_4$ , (c)  $N_2$  adsorption-desorption isotherms of bCN and uCN.

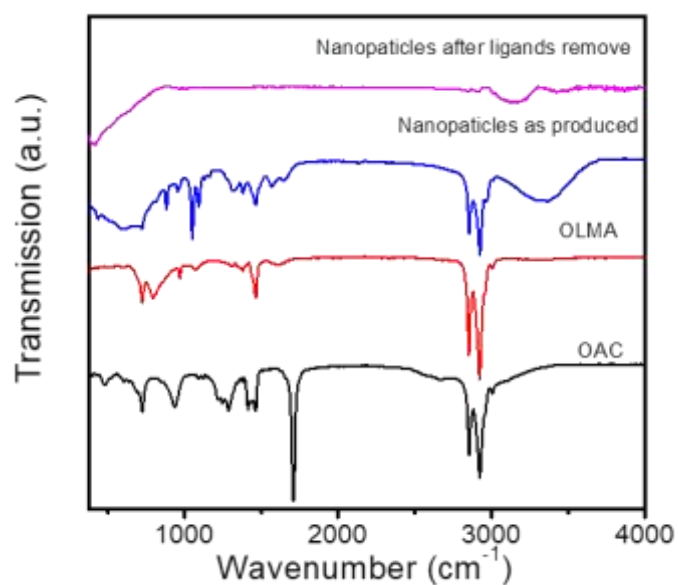

**Figure S2.** FTIR spectra of OAC, OLMA and  $\text{TiO}_2$  before and after ligands remove.

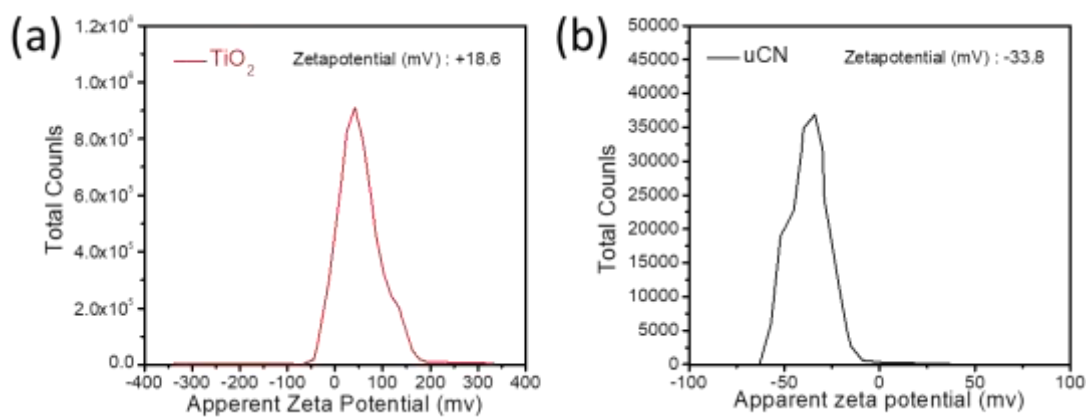

**Figure S3.** Zeta potential distribution spectrum of  $\text{TiO}_2$  after ligands removal (a) and uCN (b).

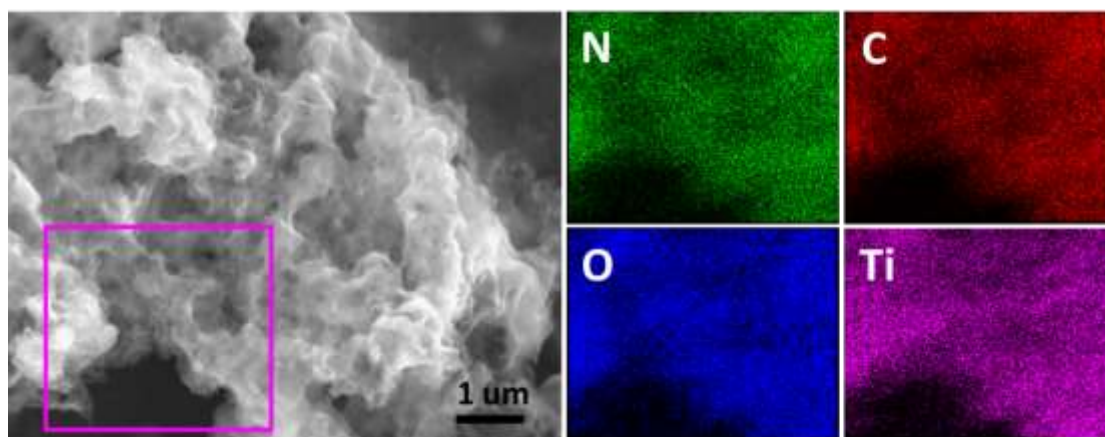

**Figure S4.** SEM image and EDS compositional maps of a  $\text{T}_1/\text{uCN}_1$  composite

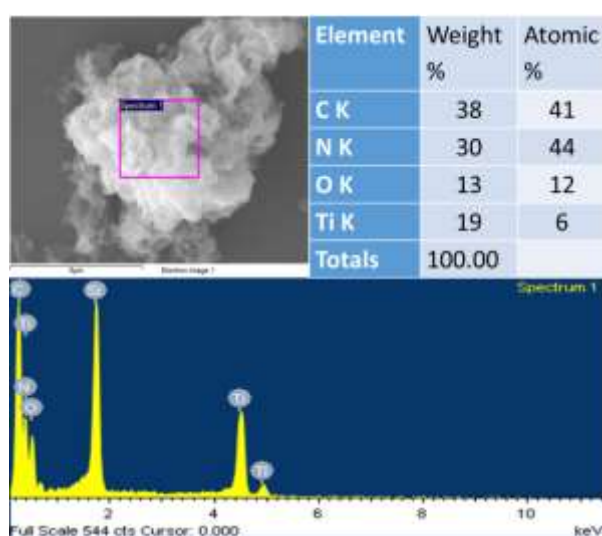

**Figure S5.** SEM image of  $\text{T}_1/\text{uCN}_2$  and corresponding EDS spectrum

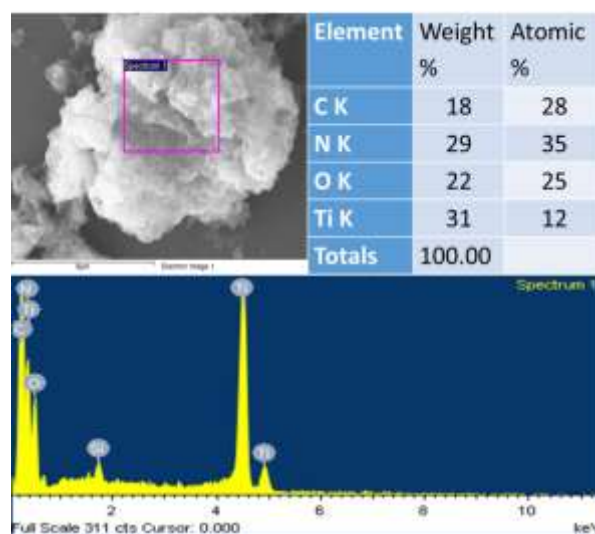

**Figure S6.** SEM image of T1/uCN2 and corresponding EDS spectrum

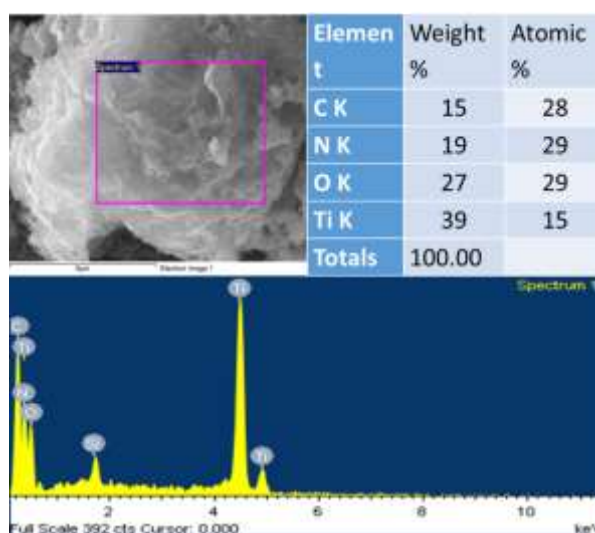

**Figure S7.** SEM image of T1/uCN2 and corresponding EDS spectrum

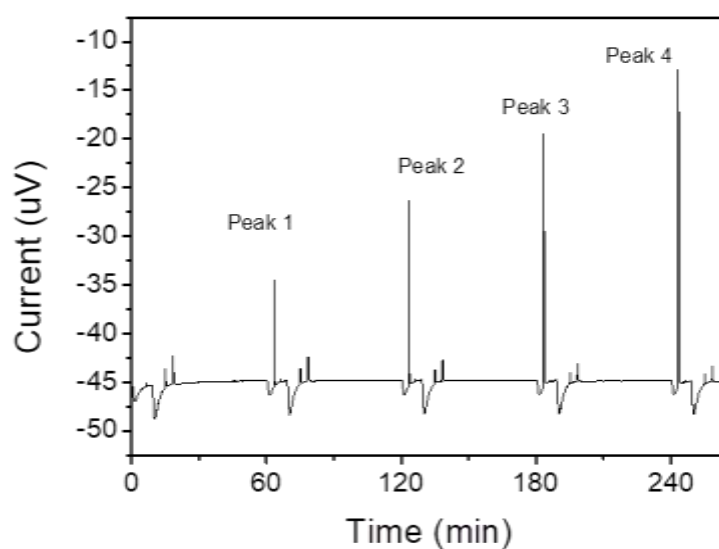

**Figure S8.** Chromatogram plots for 0.5 ml of standard hydrogen injected every half hour

**Table S1.** Gas Chromatography Peak Processing Data based on fig S8

| Peak (#) | Peak time (min) | Peak height (uV) | Peak area (Uv*s) |
|----------|-----------------|------------------|------------------|
| 1        | 61.760          | 10599            | 50777            |
| 2        | 121.765         | 18080            | 88649            |
| 3        | 181.771         | 28023            | 139827           |
| 4        | 241.786         | 36981            | 191326           |

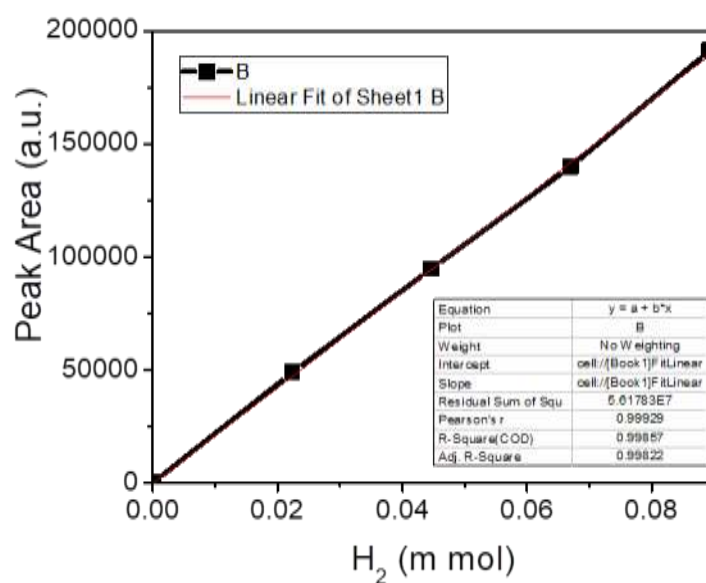

**Figure S9.** Standard hydrogen curve for gas chromatography

**Table S2.** Exponential decay-fitted parameters of fluorescence lifetime of uCN, TiO<sub>2</sub> and T<sub>1</sub>/uCN<sub>1</sub>

| Sample        | uCN  | TiO <sub>2</sub> | T <sub>1</sub> /uCN <sub>1</sub> |
|---------------|------|------------------|----------------------------------|
| $\tau$ (ns)   | 3.51 | 3.15             | 4.72                             |
| $\tau_1$ (ns) | 1.04 | 0.96             | 1.49                             |
| $\tau_2$ (ns) | 6.03 | 5.47             | 6.93                             |

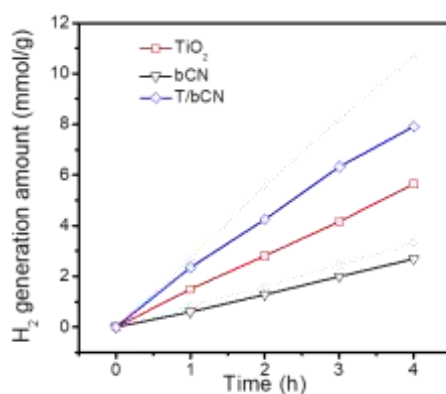

**Figure S10.** Photocatalytic hydrogen generation amount on bCN, TiO<sub>2</sub> and T<sub>1</sub>/bCN<sub>1</sub> during 4 h under simulated solar light irradiation

**Table S3.** Photocatalytic hydrogen production about TiO<sub>2</sub>/g-C<sub>3</sub>N<sub>4</sub> based catalysts

| Photocatalyst                                                          | Additional co-catalyst | Light source   | Activities (μmol h <sup>-1</sup> g <sup>-1</sup> ) | Sacrificial Agent                         | Ref.      |
|------------------------------------------------------------------------|------------------------|----------------|----------------------------------------------------|-------------------------------------------|-----------|
| Ag/TiO <sub>2</sub> /g-C <sub>3</sub> N <sub>4</sub>                   | 1% Pt                  | 400 nm filter  | 1707                                               | TEOA                                      | [1]       |
| B-TiO <sub>2</sub> /SiO <sub>2</sub> /gC <sub>3</sub> N <sub>4</sub>   | Pt                     | AM 1.5G filter | 572.6                                              | Methanol                                  | [2]       |
| MoS <sub>2</sub> /g-C <sub>3</sub> N <sub>4</sub> /GO                  | No                     | AM 1.5G filter | 1650                                               | Na <sub>2</sub> SO <sub>3</sub> (0.25 M). | [3]       |
| TiO <sub>2</sub> /g-C <sub>3</sub> N <sub>4</sub>                      | 3% Pt                  | 300 W          | 1820                                               | TEOA                                      | [4]       |
| N-TiO <sub>2</sub> /g-C <sub>3</sub> N <sub>4</sub> /Ni <sub>3</sub> P | No                     | 300 W          | 5438                                               | TEOA                                      | [5]       |
| NiS/TiO <sub>2</sub>                                                   | Pt                     | 300W           | 698                                                | Lactic acid                               | [6]       |
| Au/TiO <sub>2</sub> -g-C <sub>3</sub> N <sub>4</sub>                   | No                     | 150W           | 350                                                | Methanol                                  | [7]       |
| g-C <sub>3</sub> N <sub>4</sub> /MMT/TiO <sub>2</sub>                  | Pt                     | 350 W          | 2213                                               | Glycerol                                  | [8]       |
| ZnS- g-C <sub>3</sub> N <sub>4</sub> /TiO <sub>2</sub>                 | No                     | 300W           | 422                                                | TEOA                                      | [9]       |
| Sheet TiO <sub>2</sub> / ultrathin g-C <sub>3</sub> N <sub>4</sub>     | 1% Pt                  | AM 1.5G filter | 3875                                               | Methanol                                  | This work |

**Table S4.** The AQE values with different incident light wavelengths for T<sub>1</sub>/uCN<sub>1</sub>

| Wavelength (nm) | Light intensity (mW/cm <sup>2</sup> ) | T <sub>1</sub> /uCN <sub>1</sub> |         |
|-----------------|---------------------------------------|----------------------------------|---------|
|                 |                                       | <i>n</i> H <sub>2</sub> (umol)   | AQE (%) |
| 380             | 4.51                                  | 58.3                             | 7.16    |
| 420             | 12.14                                 | 55.8                             | 2.67    |

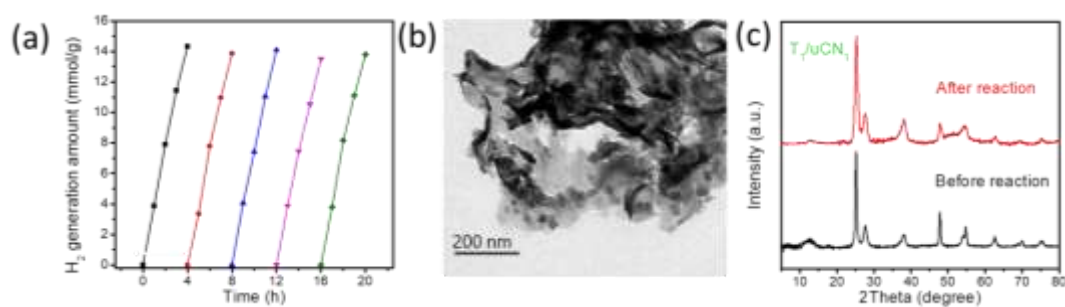

**Figure S11.** (a) Stability cycles of the T<sub>1</sub>/uCN<sub>1</sub> for H<sub>2</sub> evolution under simulated solar light irradiation; (b) TEM image of T<sub>1</sub>/uCN<sub>1</sub> after 20 h photocatalytic H<sub>2</sub> evolution reaction and (c) XRD pattern of T<sub>1</sub>/uCN<sub>1</sub> before and after 20 h photocatalytic H<sub>2</sub>O<sub>2</sub> evolution reaction.

## Reference

- [1] R. Geng, J. Yin, J. Zhou, T. Jiao, Y. Feng, L. Zhang, Y. Chen, Z. Bai, Q. Peng, In Situ Construction of Ag/TiO<sub>2</sub>/g-C<sub>3</sub>N<sub>4</sub> Heterojunction Nanocomposite Based on Hierarchical Co-Assembly with Sustainable Hydrogen Evolution, *Nanomater.* 10 (2020). doi:10.3390/nano10010001.
- [2] L. Shen, Z. Xing, J. Zou, Z. Li, X. Wu, Y. Zhang, Q. Zhu, S. Yang, W. Zhou, Black TiO<sub>2</sub> nanobelts/g-C<sub>3</sub>N<sub>4</sub> nanosheets laminated heterojunctions with efficient visible-light-driven photocatalytic performance, *Sci. Rep.* 7 (2017) 1–11.
- [3] M. Wang, P. Ju, J. Li, Y. Zhao, X. Han, Z. Hao, Facile synthesis of MoS<sub>2</sub>/g-C<sub>3</sub>N<sub>4</sub>/GO ternary heterojunction with enhanced photocatalytic activity for water splitting, *ACS Sustain. Chem. Eng.* 5 (2017) 7878–7886.
- [4] W. Gu, F. Lu, C. Wang, S. Kuga, L. Wu, Y. Huang, M. Wu, Face-to-face interfacial assembly of ultrathin g-C<sub>3</sub>N<sub>4</sub> and anatase TiO<sub>2</sub> nanosheets for enhanced solar photocatalytic activity, *ACS Appl. Mater. Interfaces.* 9 (2017) 28674–28684.
- [5] M. Wu, J. Zhang, C. Liu, Y. Gong, R. Wang, B. He, H. Wang, Rational Design and Fabrication of Noble-metal-free Ni<sub>2</sub>P Cocatalyst Embedded 3D N-TiO<sub>2</sub>/g-C<sub>3</sub>N<sub>4</sub> Heterojunctions with Enhanced Photocatalytic Hydrogen Evolution, *ChemCatChem.* 10 (2018) 3069–3077.
- [6] L. Zhang, B. Tian, F. Chen, J. Zhang, Nickel sulfide as co-catalyst on nanostructured TiO<sub>2</sub> for photocatalytic hydrogen evolution, *Int. J. Hydrogen Energy.* 37 (2012) 17060–17067.
- [7] C. Marchal, T. Cottineau, M.G. Méndez-Medrano, C. Colbeau-Justin, V. Caps, V. Keller, Au/TiO<sub>2</sub>-gC<sub>3</sub>N<sub>4</sub> nanocomposites for enhanced photocatalytic H<sub>2</sub> production from water

- under visible light irradiation with very low quantities of sacrificial agents, *Adv. Energy Mater.* 8 (2018) 1702142.
- [8] N. Fajrina, M. Tahir, 2D-montmorillonite-dispersed g-C<sub>3</sub>N<sub>4</sub>/TiO<sub>2</sub> 2D/0Dnanocomposite for enhanced photo-induced H<sub>2</sub> evolution from glycerol-water mixture, *Appl. Surf. Sci.* 471 (2019) 1053–1064.
- [9] C. Zhang, Y. Zhou, J. Bao, J. Fang, S. Zhao, Y. Zhang, X. Sheng, W. Chen, Structure regulation of ZnS@ g-C<sub>3</sub>N<sub>4</sub>/TiO<sub>2</sub> nanospheres for efficient photocatalytic H<sub>2</sub> production under visible-light irradiation, *Chem. Eng. J.* 346 (2018) 226–237.
